# Supplementary material for: Predictive Model of Lymphocyte-Specific Protein Tyrosine Kinase (LCK) Autoregulation
Source: PubMed Central journal article supplement (PMC4978775; doi:10.1007/s12195-016-0438-7), 2016-04-26
Supplement: 12195_2016_438_MOESM3_ESM.pdf [file 12195_2016_438_MOESM3_ESM.pdf]

|                                                                                                                                                                                                                                                                                                                                  |
|----------------------------------------------------------------------------------------------------------------------------------------------------------------------------------------------------------------------------------------------------------------------------------------------------------------------------------|
| $ds1/dt = -kon*s1*s11 +kcat3*s13 -kon*s1*s12 +kcat1*s4 -kon*s1*s11 +koff4*s14 +2.0*koff1*s4 -konCSK*s3*s1 +koff7*s7 +kcat2*s5 +koff8*s8 -kon*s1*s2 +koff13*s16 -2.0*kon*s1*s1 +2.0*koff2*s5 -2.0*kon*s1*s1 +koffCSKUU*s10 +koff3*s13 -kon*s1*s2 +koff14*s17 -kon*s1*s12 -kon*s1*s2 +koff5*s15 -kon*s1*s11 +koff6*s6 +kcat6*s6 ;$ |
| $ds2/dt = -kon*s1*s2 +koff8*s8 +kcat2*s5 +kcat12*s9 +koff11*s21 +koff7*s7 +koff10*s20 +koff16*s22 +kcatCSKUU*s10 +2.0*kcat8*s8 +kcat5*s15 +koff6*s6 +2.0*koff12*s9 -kon*s1*s2 -kon*s2*s12 -2.0*kon*s2*s2 -kon*s11*s2 -kon*s1*s2 +kcat14*s17 -kon*s11*s2 +kcat10*s20 +kcat7*s7 ;$                                                 |
| $ds3/dt = koffCSKUU*s10 -konCSK*s3*s11 +kcatCSKUU*s10 +kcatCSKPU*s23 -konCSK*s3*s1 +koffCSKPU*s23 ;$                                                                                                                                                                                                                             |
| $ds4/dt = -kcat1*s4 +kon*s1*s1 -koff1*s4 ;$                                                                                                                                                                                                                                                                                      |
| $ds5/dt = -koff2*s5 -kcat2*s5 +kon*s1*s1 ;$                                                                                                                                                                                                                                                                                      |
| $ds6/dt = -koff6*s6 -kcat6*s6 +kon*s1*s2 ;$                                                                                                                                                                                                                                                                                      |
| $ds7/dt = kon*s1*s2 -kcat7*s7 -koff7*s7 ;$                                                                                                                                                                                                                                                                                       |
| $ds8/dt = -kcat8*s8 -koff8*s8 +kon*s1*s2 ;$                                                                                                                                                                                                                                                                                      |
| $ds9/dt = -koff12*s9 -kcat12*s9 +kon*s2*s2 ;$                                                                                                                                                                                                                                                                                    |
| $ds10/dt = konCSK*s3*s1 -kcatCSKUU*s10 -koffCSKUU*s10 ;$                                                                                                                                                                                                                                                                         |
| $ds11/dt = -kon*s11*s12 +kcat9*s18 +2.0*kcat4*s14 +kcat1*s4 -kon*s1*s11 -kon*s1*s11 +koff11*s21 +2.0*koff9*s18 +kcat11*s21 -konCSK*s3*s11 +koff10*s20 +koff4*s14 +kcat5*s15 -2.0*kon*s11*s11 +koff5*s15 -kon*s1*s11 -kon*s11*s2 +koffCSKPU*s23 +kcat13*s16 +koff3*s13 +koff15*s19 -kon*s11*s2 +kcat7*s7 ;$                       |
| $ds12/dt = kcat14*s17 +kcat10*s20 +koff15*s19 +kcat13*s16 -kon*s2*s12 +kcat6*s6 -kon*s1*s12 +koff14*s17 +koff16*s22 +kcat11*s21 +2.0*kcat16*s22 +kcat3*s13 -kon*s1*s12 +2.0*kcat15*s19 +kcatCSKPU*s23 +kcat9*s18 +kcat12*s9 -kon*s11*s12 +koff13*s16 ;$                                                                          |
| $ds13/dt = -kcat3*s13 +kon*s1*s11 -koff3*s13 ;$                                                                                                                                                                                                                                                                                  |
| $ds14/dt = kon*s1*s11 -kcat4*s14 -koff4*s14 ;$                                                                                                                                                                                                                                                                                   |
| $ds15/dt = -koff5*s15 +kon*s1*s11 -kcat5*s15 ;$                                                                                                                                                                                                                                                                                  |
| $ds16/dt = -kcat13*s16 +kon*s1*s12 -koff13*s16 ;$                                                                                                                                                                                                                                                                                |
| $ds17/dt = -kcat14*s17 +kon*s1*s12 -koff14*s17 ;$                                                                                                                                                                                                                                                                                |
| $ds18/dt = -kcat9*s18 +kon*s11*s11 -koff9*s18 ;$                                                                                                                                                                                                                                                                                 |
| $ds19/dt = kon*s11*s12 -koff15*s19 -kcat15*s19 ;$                                                                                                                                                                                                                                                                                |

|                                                                                                            |
|------------------------------------------------------------------------------------------------------------|
| $ds_{20}/dt = -k_{off10} \cdot s_{20} - k_{cat10} \cdot s_{20} + k_{on} \cdot s_{11} \cdot s_2 ;$          |
| $ds_{21}/dt = -k_{off11} \cdot s_{21} + k_{on} \cdot s_{11} \cdot s_2 - k_{cat11} \cdot s_{21} ;$          |
| $ds_{22}/dt = k_{on} \cdot s_2 \cdot s_{12} - k_{off16} \cdot s_{22} - k_{cat16} \cdot s_{22} ;$           |
| $ds_{23}/dt = -k_{offCSKPU} \cdot s_{23} - k_{catCSKPU} \cdot s_{23} + k_{onCSK} \cdot s_3 \cdot s_{11} ;$ |

| Free             | Symbol   | Bound            |                  | Symbol   |
|------------------|----------|------------------|------------------|----------|
|                  |          | Enzyme           | Substrate        |          |
| $U_{394}U_{505}$ | $S_1$    | $U_{394}U_{505}$ | $U_{394}U_{505}$ | $S_4$    |
| $P_{394}U_{505}$ | $S_{11}$ | $U_{394}U_{505}$ | $U_{394}U_{505}$ | $S_5$    |
| $U_{394}P_{505}$ | $S_2$    | $U_{394}U_{505}$ | $P_{394}U_{505}$ | $S_{13}$ |
| $P_{394}P_{505}$ | $S_{12}$ | $P_{394}U_{505}$ | $U_{394}U_{505}$ | $S_{14}$ |
| CSK              | $S_3$    | $P_{394}U_{505}$ | $U_{394}U_{505}$ | $S_{15}$ |
|                  |          | $U_{394}U_{505}$ | $U_{394}P_{505}$ | $S_6$    |
|                  |          | $U_{394}P_{505}$ | $U_{394}U_{505}$ | $S_7$    |
|                  |          | $U_{394}P_{505}$ | $U_{394}U_{505}$ | $S_8$    |
|                  |          | $P_{394}U_{505}$ | $P_{394}U_{505}$ | $S_{18}$ |
|                  |          | $U_{394}P_{505}$ | $P_{394}U_{505}$ | $S_{20}$ |
|                  |          | $P_{394}U_{505}$ | $U_{394}P_{505}$ | $S_{21}$ |
|                  |          | $U_{394}P_{505}$ | $U_{394}P_{505}$ | $S_9$    |
|                  |          | $P_{394}P_{505}$ | $U_{394}U_{505}$ | $S_{16}$ |
|                  |          | $P_{394}P_{505}$ | $U_{394}U_{505}$ | $S_{17}$ |
|                  |          | $P_{394}P_{505}$ | $P_{394}U_{505}$ | $S_{19}$ |
|                  |          | $P_{394}P_{505}$ | $U_{394}P_{505}$ | $S_{22}$ |
|                  |          | CSK              | $U_{394}U_{505}$ | $S_{10}$ |
|                  |          | CSK              | $P_{394}U_{505}$ | $S_{23}$ |
